# Supplementary material for: Conductive 3D sponges for affordable and highly-efficient water purification
Source: Royal Society of Chemistry journal article supplement (doi:10.1039/c7nr09435c), 2018-01-01
Supplement: c7nr09435c1.pdf [file c7nr09435c1.pdf]

## Supplementary Information for

### Conductive 3D Sponge for Affordable and Highly-efficient Water Purification

Yanbiao Liu,<sup>\*a,b,c</sup> Fang Li,<sup>a,b,c</sup> Qin Xia,<sup>a</sup> Jiawei Wu,<sup>d</sup> Jianshe Liu,<sup>a,b,c</sup> Mingzhi Huang,<sup>e</sup>  
and Jianping Xie<sup>\*d</sup>

- a. School of Environmental Science and Engineering, Donghua University, 2999 North Renmin Road, Shanghai, 201620 P.R. China. E-mail: yanbiaoliu@dhu.edu.cn; Fax: +86 21 6779 2522; Tel: +86 21 6779 2519.
- b. Engineering Center of ministry of Environmental Protection (Textile), Donghua University, 2999 North Renmin Road, Shanghai, 201620 P.R. China.
- c. Shanghai Institute of Pollution Control and Ecological Security, Shanghai, 200092 P.R. China.
- d. Department of Chemical and Biomolecular Engineering, National University of Singapore, 4 Engineering Drive 4, 117585 Singapore, E-mail: chexiej@nus.edu.sg; Fax: +65 6516 1936; Tel: +65 6516 1067.
- e. Department of Water Resource and Environment, Guangdong Provincial Key Laboratory of Urbanization and Geo-simulation, Sun Yan-sen University, Guangzhou 510275, P.R. China.

Supporting Information: 8 figures.

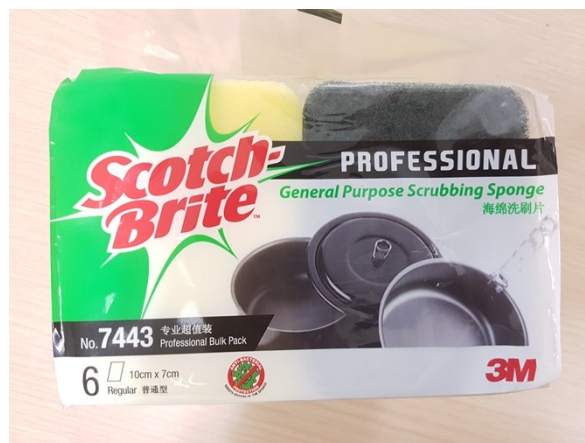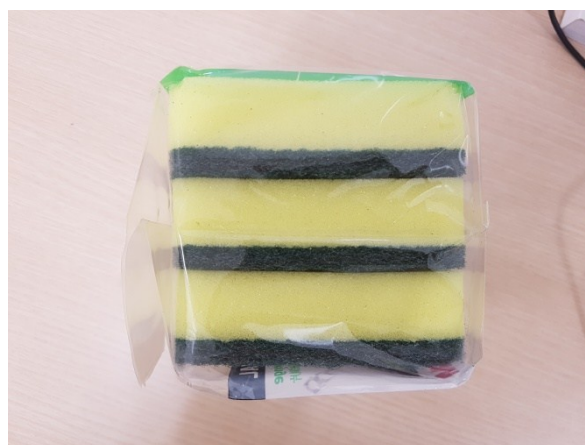

**Figure S1.** Digital pictures of commercial polyurethane sponges used in the present work.

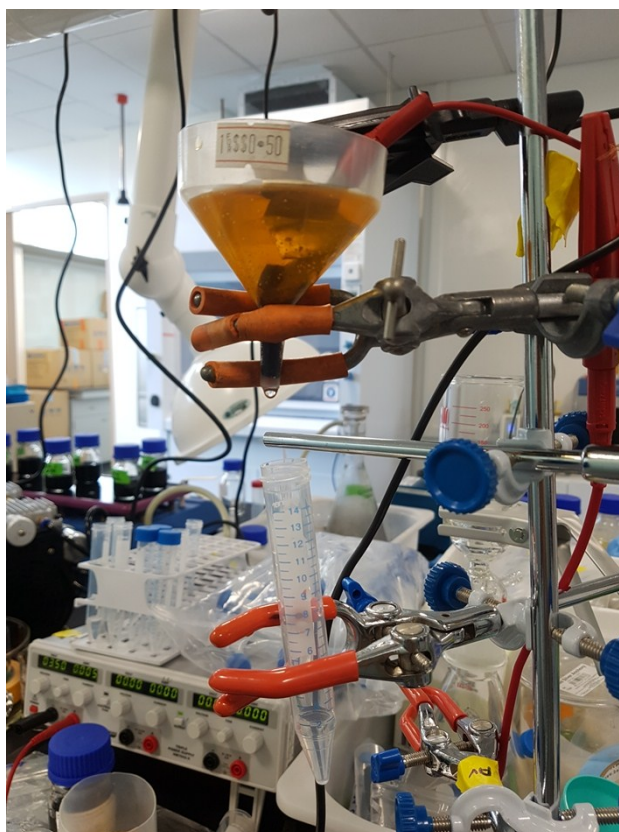

**Figure S2.** Digital picture of the filtration setup and filtration device.

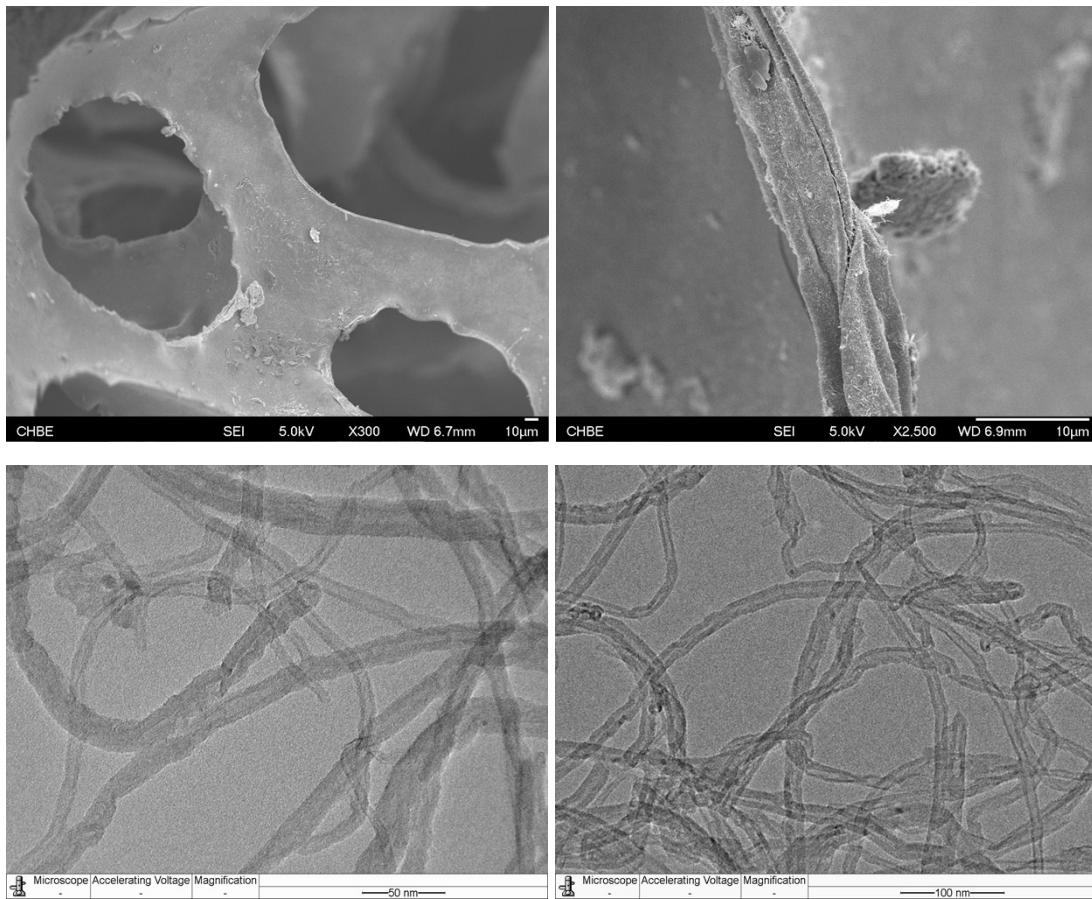

**Figure S3.** (a, b) FESEM images of the CNT sponge and (c,d) TEM images of the CNT.

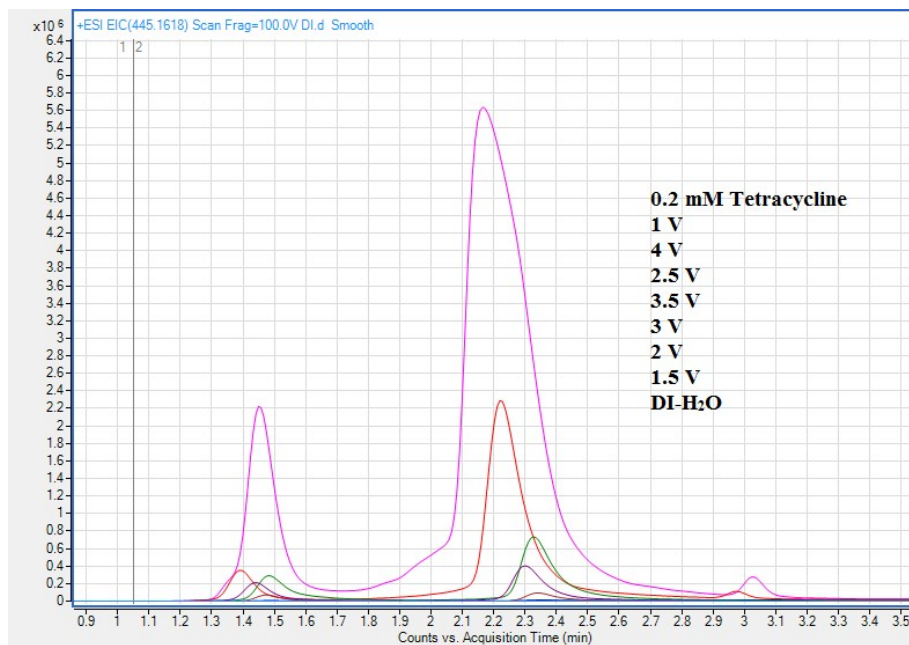

**Figure S4.** The extracted ion chromatogram of  $m/z$  445.162 of the influent tetracycline and effluent samples.

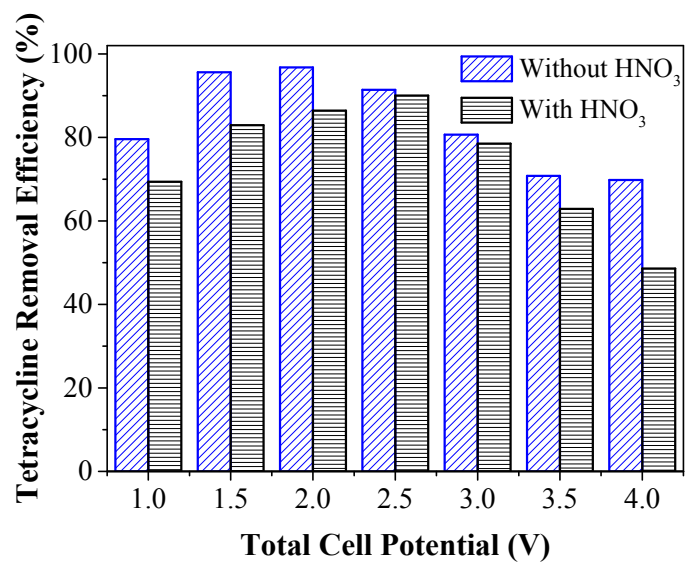

**Figure S5.** Effect of HNO<sub>3</sub> treatment on tetracycline removal efficiency as a function of total cell potential.

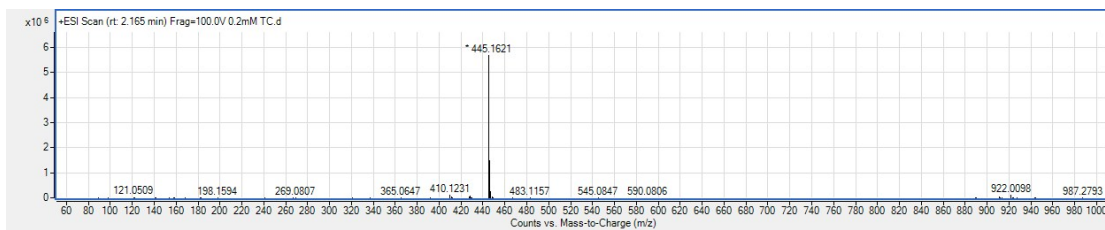

**Figure S6.** The MS spectra of TC effluent sample showing the presence of  $m/z = +445.162$ ,  $m/z = +365.065$  and  $m/z = +269.0807$ .

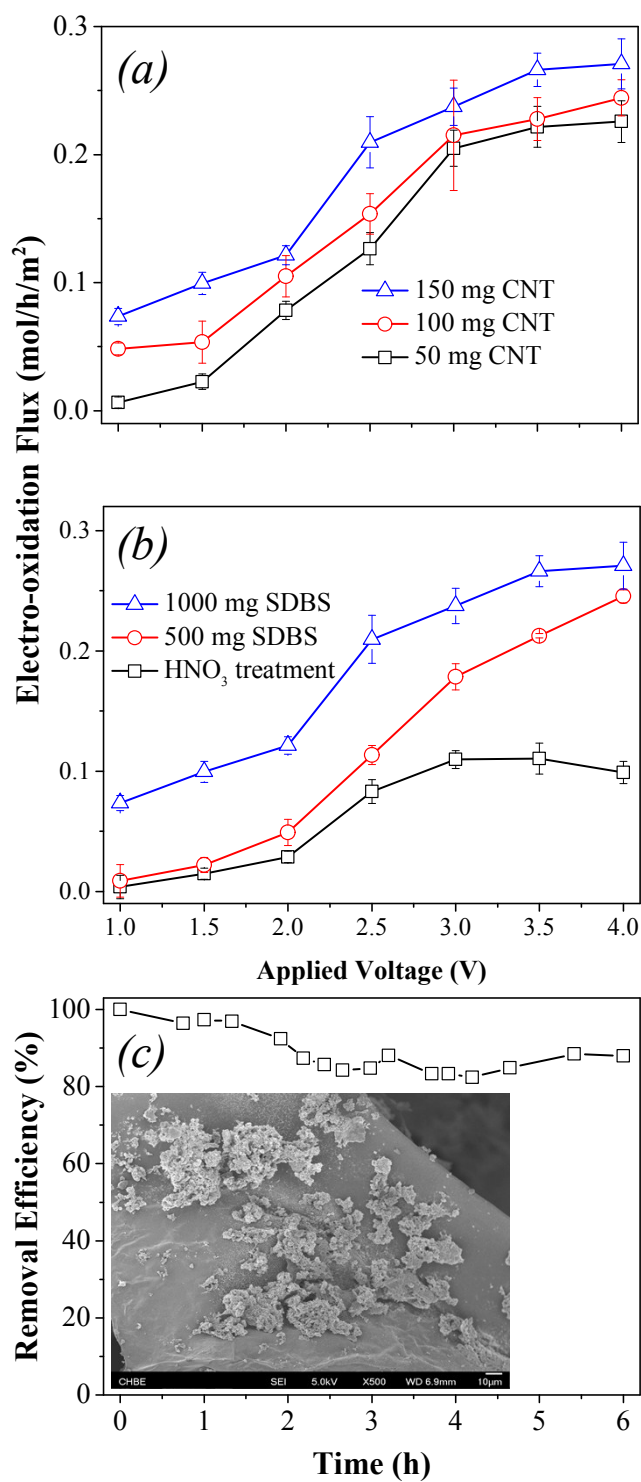

**Figure S7.** Effect of CNT loading (a) and SDBS concentration (b) on the removal of methyl orange by the CNT sponge sample. The removal efficiency of methyl orange as a function of time. Inset shows the FESEM image of the CNT sponge after 6 h continuous operation showing the presence of precipitates.



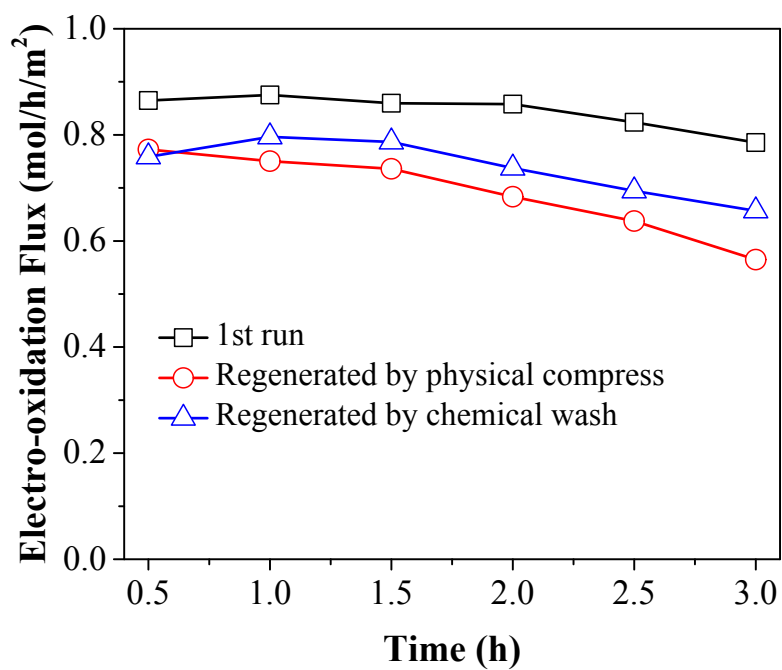

**Figure S8.** Comparison of two regeneration methods for TC electro-oxidation by the CNT sponge.
